# Supplementary material for: A cell cycle-dependent CRISPR-Cas9 activation system based on an anti-CRISPR protein shows improved genome editing accuracy
Source: PubMed Central journal article supplement (PMC7584632; doi:10.1038/s42003-020-01340-2), 2020-10-23
Supplement: 42003_2020_1340_MOESM1_ESM.pdf [file 42003_2020_1340_MOESM1_ESM.pdf]

**Supplementary Information**

**A Cell Cycle-dependent CRISPR-Cas9 Activation System Based on an Anti-CRISPR Protein Shows Improved Genome Editing Accuracy**

Daisuke Matsumoto, Hirokazu Tamamura, and Wataru Nomura\*

*1Institute of Biomaterials and Bioengineering, Tokyo Medical and Dental University, 2-3-10  
Kandasurugadai, Chiyoda-ku, Tokyo, 101-0062, Japan*

*2Graduate School of Biomedical and Health Sciences, Hiroshima University, 1-2-3 Kasumi  
Minami-ku, Hiroshima, 734-8553, Japan*

*\* To whom correspondence should be addressed. Tel: +81-82-257-5308; Fax: +81-82-257-  
5309; Email: wnomura@hiroshima-u.ac.jp*

*† Present Address: Daisuke Matsumoto, Department of Chemistry, The Scripps Research  
Institute, La Jolla, CA, 92037, USA*

### Supplementary Information: Figures

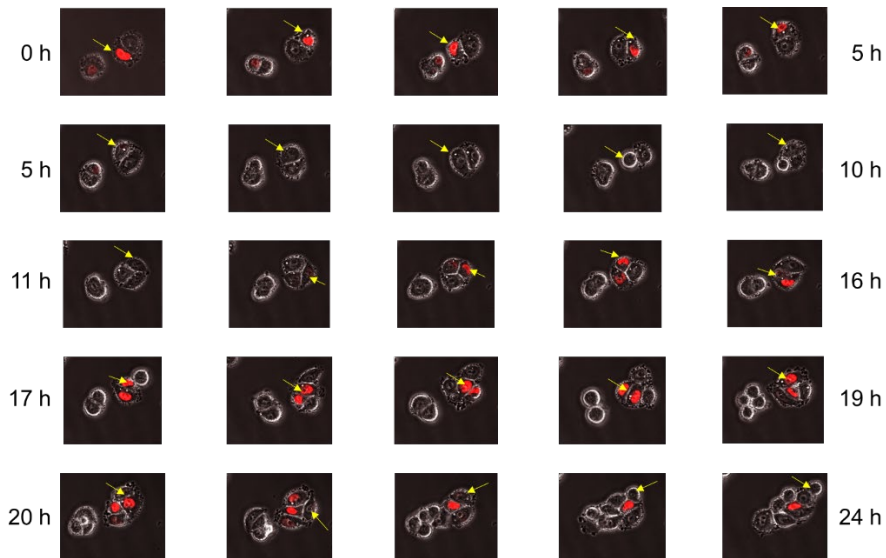

**Supplementary Figure 1.** Change of the expression level of mKO2-Cdt1 (Fucci) depending on time-lapse. Time indicate hours from the start of observation.

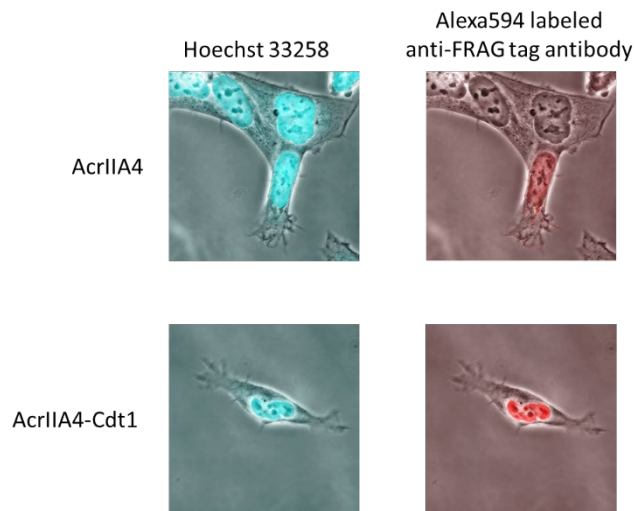

**Supplementary Figure 2.** Confirmation of expression and localization of AcrIIA4 and AcrIIA4-Cdt1 in 293A cell. Immunostaining was performed 48 h after transfection. AcrIIA4 and AcrIIA4-Cdt1 were labeled by Alexa594 labeled anti-FLAG tag antibody. Nucleus was stained by Hoechst 33258.

**A** Thymidine release

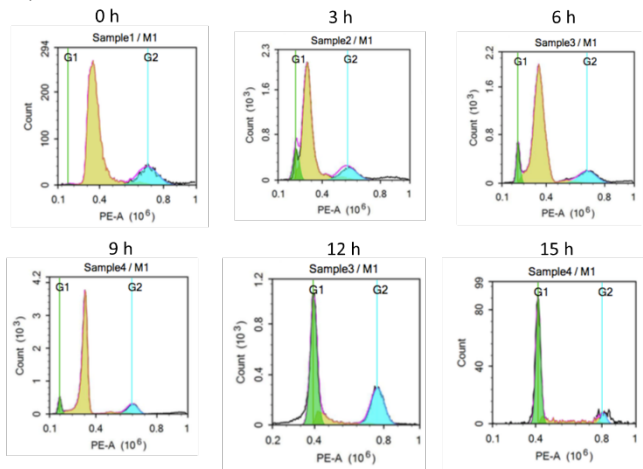

Nocodazole release

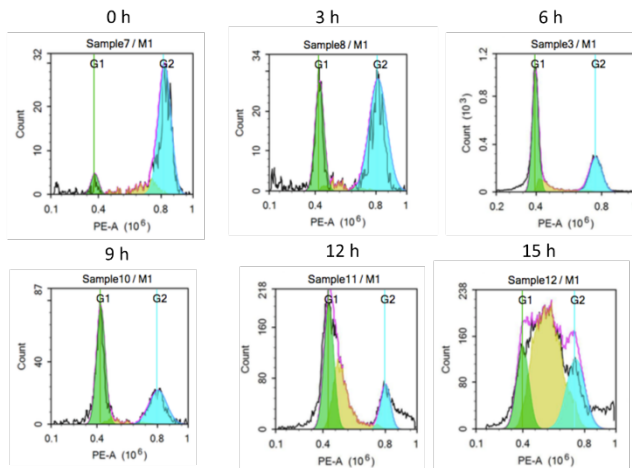

**Supplementary Figure 3.** FACS analysis for cell cycle. Cells were synchronized by double Thymidine block or Nocodazole. Cell cycle population was analyzed at each time after release from the drugs. Green range shows G<sub>1</sub> phase. Yellow range shows S phase. Blue range shows G<sub>2</sub> phase.

Release from  
thymidine treatment

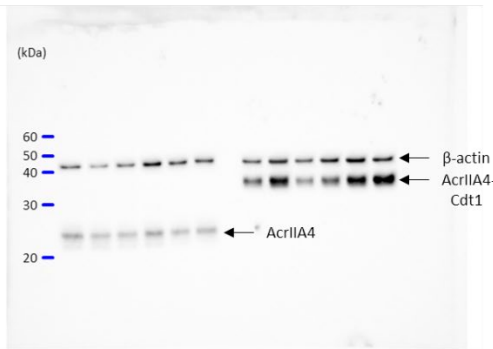

Release from  
nocodazole treatment

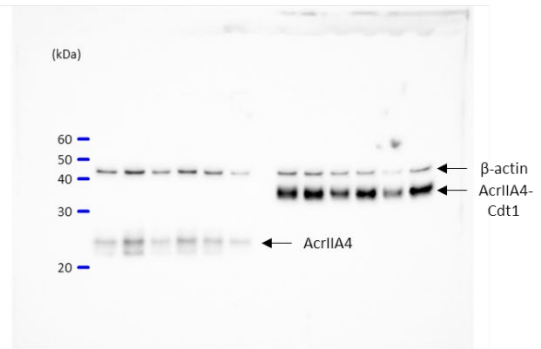

Release from  
thymidine treatment

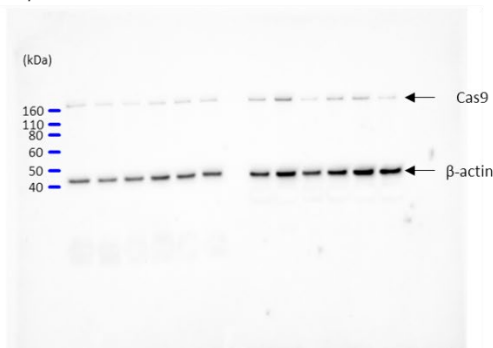

Release from  
nocodazole treatment

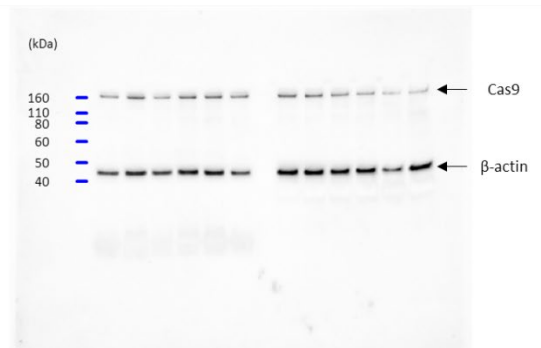

**Supplementary Figure 4.** Western blotting images for Fig. 3. Molecular sizes are shown based on the protein marker images. Cells were synchronized by double Thymidine block or Nocodazole.

### H2B target site

TCAGACACAAGACTTCAACTCTTCACCTTATTTGCATAAGCGATTCTATATAAAAAGCGCCTTGCATACCCTGCTCAC  
GCTGTTTTT CCTTTTCGTTGGCGCTTTATAGC TACACAGTGCTATGCCAGAGCCAGCGAAGTCTGCTCCCGCCCCGAA  
AAAGGGCTCCAAGAAGGCGGTGAC

### Sequence after HDR

TCAGACACAAGACTTCAACTCTTCACCTTATTTGCATAAGCGATTCTATATAAAAAGCGCCTTGCATACCCTGCTCAC  
GCTGTTTTT CCTTTT GGATCCCTCGAGGCGGCCG CGTTGGCGCTTTATAGC TACACAGTGCTATGCCAGAGCCAGCG  
AAGTCTGCTCCCGCCCCGAAAAGGGCTCCAAGAAGGCGGTGAC

### AAVS1 target site

AGGAGGAGGCCAAGGATGGGGCTTTTCTGTCACCAATCCTGTCCCTA GTGGCCCCACTGTGGGTGGAGG GGACAGA  
TAAAAGTACCCAGAACCAGAGCCACATTAACCGGCCCTGGGAATATAAGGTG

### Sequence after HDR

AGGAGGAGGCCAAGGATGGGGCTTTTCTGTCACCAATCCTGTCCCTA GTGGCCCCACTGTGG AAGCTTGGATCC GGA  
GGGGACAGATAAAAAGTACCCAGAACCAGAGCCACATTAACCGGCCCTGGGAATATAAGGTG

### EMX1 target site

CAGGTGAAGGTGTGGTTCCAGAACCGGAGGACAAAGTACAAACGGCAGAAGCTGGAGGAGGAAGGGCCT GAGTCCGAG  
CAGAAGAAGAAGGGCTCCCATCACATCAACCGGTGGCGCATTGCCACGAAGCAGGCCAATGGGAGGACATCGATG

### Sequence after HDR

CAGGTGAAGGTGTGGTTCCAGAACCGGAGGACAAAGTACAAACGGCAGAAGCTGGAGGAGGAAGGGCCT GAGTCCGAG  
CAGAAG AAGCTTGGATCC AAGGGCTCCCATCACATCAACCGGTGGCGCATTGCCACGAAGCAGGCCAATGGGAGGAC  
ATCGATG

### VEGFA target site

GAAGCTGGGTGAATGGAGCGAGCAGCGTCTTCGAGAGTGAGGACGTGTGTGTCTGTGTG GGTGAGTGAGTGTGTGCGT  
GTGGGGTTGAGGGCGTTGGAGCGGGGAGAAGGCCAGGGGTCCTCCAGGATCCAATAGATCTGTGTGTCCCTCTC

### Sequence after HDR

GAAGCTGGGTGAATGGAGCGAGCAGCGTCTTCGAGAGTGAGGACGTGTGTGTCTGTGTG GGTGAGTGAGTGTGT AAGC  
TTGGATCC TGTGGGGTTGAGGGCGTTGGAGCGGGGAGAAGGCCAGGGGTCCTCCAGGATCCAATAGATCTGTGTGT  
CCCTCTC

**Supplementary Figure 5.** Sequences around target sites and change of the sequence by HDR. Yellow highlights show seed sequences for SpyCas9 recognition and underlines indicate PAM sequences. Red characters are inserted sequences by HDR.

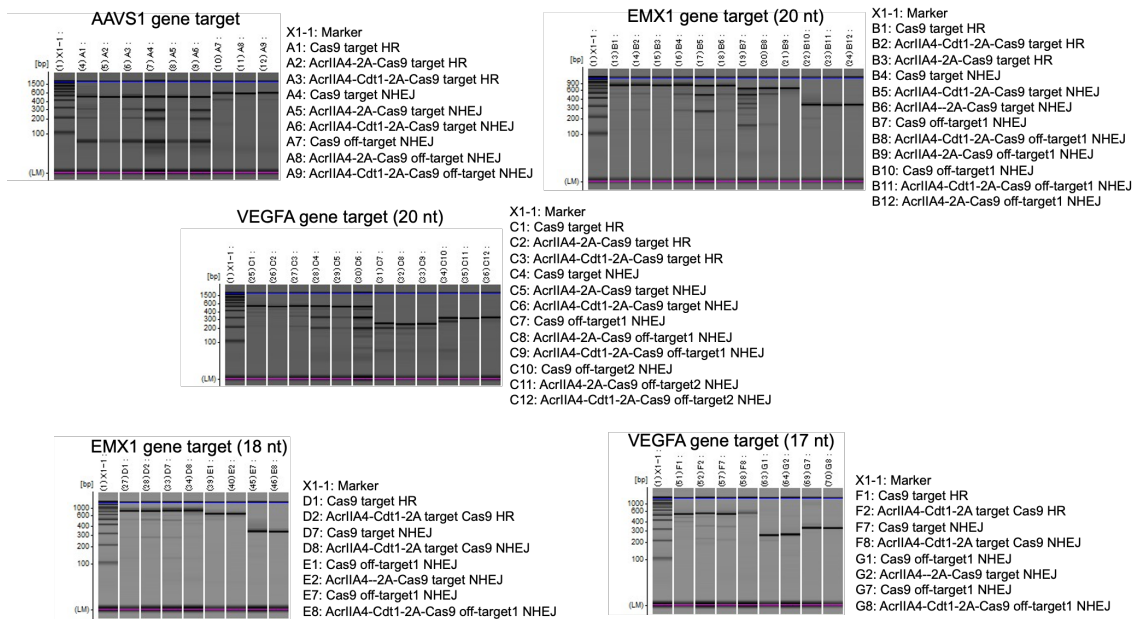

**Supplementary Figure 6.** Images of each result in Figs. 6 and 7. These images were made from the peak intensities by MultiNA viewer software.

## Supplementary Table 1

| Name                 | Sequence (5' to 3')                                                                                                                       |
|----------------------|-------------------------------------------------------------------------------------------------------------------------------------------|
| CMV Forward          | CGCAAATGGGCGGTAGGCGTG                                                                                                                     |
| BamHI_NLS-AcrIIA4_Fw | ctcctggatccgccaccatggGTGGCCCGAAGAAGAAACGGAAGGTAGGT<br>GGCggaatataaatgacctcataag                                                           |
| Acr-REsite_XbaI_Rv   | GGAGGATCTAGATTACTCGAGCGGCCCCAGTGT                                                                                                         |
| pEBMultiHyg long Fw  | ccgggggatccactagtcttagagcGCCACCATGGGTGGCCCG                                                                                               |
| 2A-Cas9              | gacttcctctgccctcCTCGAGCGGCCGCCAGTG                                                                                                        |
| NLS-Acr long Fw      | Gcggccgctcgaggaggcagaggaagtctgctaacaatgcgggtgacgtcg<br>aggagaatcctggcccaGACAAGAAGTACTCCATTGGGC                                            |
| pEBMulti-Hyg long Rv | atggctgattatgatctagagtcgcTCACACCTTCCTCTTCTTCTTGG                                                                                          |
| NLS-Acr-Cdt1 long Fw | Ccaggacaccatcgaggcagaggaagtctgctaacaatgcgggtgacgtcg<br>aggagaatcctggcccaGACAAGAAGTACTCCATTGGGC                                            |
| pEBCas9 Fw           | ccgggggatccactagtcttagagcGCCACCATGGACAAGAAGTAC                                                                                            |
| pEBCas9 Rv           | atggctgattatgatctagagtcgcTCACACCTTCCTCTTCTTCTTGG                                                                                          |
| gRNA_H2B_Fw          | TTTCTTGGCTTTATATATCTTGTGGAAAGGACGAAACACCgctataaagc<br>gccaacgaaa                                                                          |
| gRNA_H2B_Rv          | GACTAGCCTTATTTTAACTTGCTATTTCTAGCTCTAAAACCTTCGTTGGC<br>GCTTTATAGC                                                                          |
| gRNA_AAVS1_Fw        | TTTCTTGGCTTTATATATCTTGTGGAAAGGACGAAACACCGTGGCCCCAC<br>TGTGGGGTGG                                                                          |
| gRNA_AAVS1_Rv        | GACTAGCCTTATTTTAACTTGCTATTTCTAGCTCTAAAACCCACCCACACA<br>GTGGGGCCAC                                                                         |
| gRNA_EMX1_Fw         | TTTCTTGGCTTTATATATCTTGTGGAAAGGACGAAACACCGAGTCCGAGC<br>AGAAGAAGAA                                                                          |
| gRNA_EMX1_Rv         | GACTAGCCTTATTTTAACTTGCTATTTCTAGCTCTAAAACCTTCTTCTTCT<br>GCTCGGACTC                                                                         |
| gRNA_VEGFA_Fw        | TTTCTTGGCTTTATATATCTTGTGGAAAGGACGAAACACCGGTGAGTGAG<br>TGTGTGCGTG                                                                          |
| gRNA_VEGFA_Rv        | GACTAGCCTTATTTTAACTTGCTATTTCTAGCTCTAAAACCCACGCACACA<br>CTCACTCACC                                                                         |
| ssODN_AAVS1          | TATATCCCAGGGCCGGTAAATGTGGCTCTGGTCTGGGTACTTTT<br>ATCTGTCCCCTCCGATCCAAGCTTCCACAGTGGGGCCACTAGGGACAGG<br>ATTGGTGACAGAAAAGCCCCATCCTTAGGCCTCC   |
| ssODN_EMX1           | TCCTCCCCATTGGCCTGCTTCGTGGCAATGCGCCACCGGTTGATGTGATG<br>GGAGCCCTTGATCCAAGCTTCTTCTGCTCGGACTCAGGCCCTTCCTCCT<br>CCAGCTTCTGCCGTTTGTACTTTGTCCCTC |
| ssODN_VEGFA          | TATTGGAATCCTGGAGTGACCCCTGGCCTTCTCCCCGCTCCAACGCCCTC<br>AACCCACAGGATCCAAGCTTACACACTCACTCACCACACAGACACACA<br>CGTCCTCACTCTCGAAGACGCTGCTCGCT   |
| T7E1 H2B T Fw        | GGCCCTAGAAGAGCGAGTCT                                                                                                                      |

|                   |                             |
|-------------------|-----------------------------|
| T7E1 H2B T Rv     | GCGCTCGAAAATGTCGTTACACA     |
| T7E1 AAVS1 T Fw   | TTCGGGTCACCTCTCACTCC        |
| T7E1 AAVS1 OT Fw  | GCATTAGGGCTTGGTCATGT        |
| T7E1 AAVS1 T Rv   | GGCTCCATCGTAAGCAAACC        |
| T7E1 AAVS1 OT Rv  | TCCTCCCATGCTATGTCTCC        |
| T7E1 EMX1 T Fw    | GGAGCAGCTGGTCAGAGGGG        |
| T7E1 EMX1 OT1 Fw  | TCTCTCCTTCAACTCATGACCAGCT   |
| T7E1 EMX1 OT2 Fw  | TGAAATCTCACCTGGGCGAGA       |
| T7E1 EMX1 T Rv    | GGGAAGGGGACACTGGGGA         |
| T7E1 EMX1 OT1 Rv  | ATCTGCACATGTATGTACAGGAGTCAT |
| T7E1 EMX1 OT2 Rv  | TGCAGTCTGCCTTTTTGGGG        |
| T7E1 VEGFA T Fw   | TCCAGATGGCACATTGTCAG        |
| T7E1 VEGFA OT1 Fw | GAGGGGGAAGTCACCGACAA        |
| T7E1 VEGFA OT2 Fw | TCCTTTGAGGTTTCATCCCCC       |
| T7E1 VEGFA T Rv   | AGGGAGCAGGAAAGTGAGGT        |
| T7E1 VEGFA OT1 Rv | TACCCGGGCCGTCTGTTAGA        |
| T7E1 VEGFA OT2 Rv | CCAATCCAGGATGATTCCGC        |
