# Supplementary material for: A cell cycle-dependent CRISPR-Cas9 activation system based on an anti-CRISPR protein shows improved genome editing accuracy
Source: PubMed Central journal article supplement (PMC7584632; doi:10.1038/s42003-020-01340-2), 2020-10-23
Supplement: 42003_2020_1340_MOESM3_ESM.pdf [file 42003_2020_1340_MOESM3_ESM.pdf]

## **Description of Additional Supplementary Files**

File Name: Supplementary Data 1

Description: Source data
